# Supplementary material
Source: publisher site journal article supplement (https://www.dovepress.com/article/404525)
Supplement: Supplementary file 1 [file get_supplementary_file.php]

# Supplementary material

**Table S1** Visits to professionals in the last 4 months

|  |  | **Mild Asthma** | | | **Moderate/severe Asthma** | | | **Total** | | |
| --- | --- | --- | --- | --- | --- | --- | --- | --- | --- | --- |
|  |  | **Number of programmed visits** | **Crisis/episode visits** | **Total** | **Number of programmed visits** | **Crisis/episode visits** | **Total** | **Number of programmed visits** | **Crisis/episode visits** | **Total** |
| CAP family doctor | Mean (SD) | 0.3 (0.6) | 0.1 (0.3) | 0.4 (0.8) | 0.8 (1.6) | 0.5 (1.0) | 1.3 (2.0) | 0.6 (1.2) | 0.3 (0.8) | 0.9 (1.6) |
| Valid N | 43 | 43 | 43 | 47 | 47 | 47 | 90 | 90 | 90 |
| Private family doctor | Mean (SD) | 0.3 (1.0) | 0.1 (0.6) | 0.4 (1.6) | 0.2 (0.9) | 0.1 (0.4) | 0.3 (1.2) | 0.2 (1.0) | 0.1 (0.5) | 0.3 (1.4) |
| Valid N | 43 | 43 | 43 | 47 | 47 | 47 | 90 | 90 | 90 |
| CAP Pneumologist | Mean (SD) | 0.1 (0.4) | 0.0 (0.2) | 0.2 (0.4) | 0.7 (1.3) | 0.1 (0.4) | 0.8 (1.6) | 0.4 (1.0) | 0.1 (0.3) | 0.5 (1.2) |
| Valid N | 43 | 43 | 43 | 47 | 47 | 47 | 90 | 90 | 90 |
| Private Pneumologist | Mean (SD) | 0.1 (0.6) | 0.1 (0.3) | 0.2 (1.0) | 0.2 (0.6) | 0.0 (0.2) | 0.3 (0.7) | 0.2 (0.6) | 0.1 (0.3) | 0.2 (0.8) |
| Valid N | 43 | 43 | 43 | 47 | 47 | 47 | 90 | 90 | 90 |
| CAP Allergologist | Mean (SD) | 0.3 (0.7) | 0.1 (0.2) | 0.3 (0.8) | 0.6 (1.0) | 0.1 (0.3) | 0.6 (1.2) | 0.4 (0.9) | 0.1 (0.2) | 0.5 (1.0) |
| Valid N | 43 | 43 | 43 | 47 | 47 | 47 | 90 | 90 | 90 |
| Private Allergologist | Mean (SD) | 0.3 (0.9) | 0.2 (0.8) | 0.4 (1.6) | 0.0 (0.0) | 0.0 (0.0) | 0.0 (0.0) | 0.1 (0.6) | 0.1 (0.6) | 0.2 (1.1) |
| Valid N | 43 | 43 | 43 | 47 | 47 | 47 | 90 | 90 | 90 |
| Nursery | Mean (SD) | 0.1 (0.4) | 0.1 (0.2) | 0.2 (0.5) | 0.6 (1.5) | 0.2 (0.7) | 0.8 (1.7) | 0.4 (1.1) | 0.1 (0.6) | 0.5 (1.3) |
| Valid N | 43 | 43 | 43 | 47 | 47 | 47 | 90 | 90 | 90 |
| Company doctor | Mean (SD) | 0.1 (0.2) | 0.0 (0.2) | 0.1 (0.3) | 0.2 (0.8) | 0.0 (0.2) | 0.2 (0.9) | 0.1 (0.6) | 0.0 (0.2) | 0.1 (0.7) |
| Valid N | 43 | 43 | 43 | 47 | 47 | 47 | 90 | 90 | 90 |
| Total visits | Mean (SD) | 1.6 (2.5) | 0.6 (1.8) | 2.1 (4.2) | 3.3 (4.2) | 1.0 (1.9) | 4.3 (5.2) | 2.5 (3.6) | 0.8 (1.8) | 3.3 (4.8) |
| Valid N | 43 | 43 | 43 | 47 | 47 | 47 | 90 | 90 | 90 |

**Abbreviations:** CAP: Community acquired pneumonia; N: Total number of patients; SD: Standard deviation.

**Table S2** Hospitalizations in the last year

|  |  | **Mild Asthma** | **Moderate/severe Asthma** | **Total** |
| --- | --- | --- | --- | --- |
| Hospitalizations | No | 42 (97.7%) | 40 (85.1%) | 82 (91.1%) |
| Yes | 1 (2.3%) | 7 (14.9%) | 8 (8.9%) |
| Public hospital | 1 (100.0%) | 6 (85.7%) | 7 (87.5%) |
| Private hospital | 0 | 1 (14.3%) | 1 (12.5%) |
| UVI/UCI public center | 1 (100.0%) | 1 (14.3%) | 2 (25.0%) |
| UVI/UCI private center | 0 | 1 (14.3%) | 1 (12.5%) |
| Valid N | 1 | 7 | 8 |
| Valid N | 43 | 47 | 90 |
| Public center number of hospitalizations | Mean (SD) | 1.0 (.) | 1.2 (0.4) | 1.1 (0.4) |
| Valid N | 1 | 6 | 7 |
| Private center number of hospitalizations | Mean (SD) | - | 1.0 (.) | 1.0 (.) |
| Valid N | - | 1 | 1 |
| ICU/ISU public center number of hospitalizations | Mean (SD) | 1.0 (.) | 1.0 (.) | 1.0 (0.0) |
| Valid N | 1 | 1 | 2 |
| ICU/UVI private center number of hospitalizations | Mean (SD) | - | 1.0 (.) | 1.0 (.) |
| Valid N | - | 1 | 1 |
| Total number of hospitalizations | Mean (SD) | 2.0 (.) | 1.4 (0.8) | 1.5 (0.8) |
| Valid N | 1 | 7 | 8 |
| Public center number of days in hospital | Mean (SD) | 1.0 (.) | 6.3 (4.2) | 5.6 (4.3) |
| Valid N | 1 | 6 | 7 |
| Private center number of days in hospital | Mean (SD) | - | 4.0 (.) | 4.0 (.) |
| Valid N | - | 1 | 1 |
| ICU/ISU public center number of days in hospital | Mean (SD) | 1.0 (.) | 3.0 (.) | 2.0 (1.4) |
| Valid N | 1 | 1 | 2 |
| ICU/ISU private center number of days in hospital | Mean (SD) | - | 3.0 (.) | 3.0 (.) |
| Valid N | - | 1 | 1 |
| Total number of days in hospital | Mean (SD) | 2.0 (.) | 6.9 (4.2) | 6.3 (4.2) |
| Valid N | 1 | 7 | 8 |

**Abbreviations:** ICU/ISU: Intensive Care Units/Intensive Surveillance Units; N: Total number of patients; SD: Standard deviation.

**Table S3** Emergencies in the last year

|  |  | **Mild Asthma** | **Moderate/severe Asthma** | **Total** |
| --- | --- | --- | --- | --- |
| Emergencies | No | 40 (95.2%) | 35 (76.1%) | 75 (85.2%) |
| Yes | 2 (4.8%) | 11 (23.9%) | 13 (14.8%) |
| Public hospital | 1 (50.0%) | 6 (60.0%) | 7 (58.3%) |
| CAP | 1 (50.0%) | 6 (60.0%) | 7 (58.3%) |
| Private center | 0 | 1 (10.0%) | 1 (8.3%) |
| Valid N | 2 | 10 | 12 |
| N missings | 0 | 1 | 1 |
| Valid N | 42 | 46 | 88 |
| N missings | 12 | 32 | 44 |
| Public center number of times | Mean (SD) | 2.0 (.) | 1.2 (0.4) | 1.3 (0.5) |
| Valid N | 1 | 6 | 7 |
| CAP number of times | Mean (SD) | 1.0 (.) | 2.0 (1.3) | 1.9 (1.2) |
| Valid N | 1 | 6 | 7 |
| Private center number of times | Mean (SD) | - | 2.0 (.) | 2.0 (.) |
| Valid N | - | 1 | 1 |
| Total number of times | Mean (SD) | 1.5 (0.7) | 2.1 (1.4) | 2.0 (1.3) |
| Valid N | 2 | 10 | 12 |

**Abbreviations:** CAP: Community acquired pneumonia; N: Total number of patients; SD: Standard deviation.

Table S4 Treatment resource

|  |  | **Mild Asthma** | **Moderate/severe Asthma** | **Total** |
| --- | --- | --- | --- | --- |
| Current treatment | No | 10 (22.2%) | 2 (3.7%) | 12 (12.1%) |
| Yes | 35 (77.8%) | 52 (96.3%) | 87 (87.9%) |
| Maintenance treatment (daily) | 12 (34.3%) | 14 (26.9%) | 26 (29.9%) |
| Relief/rescue treatment (only in asthma episodes/crisis) | 14 (40.0%) | 3 (5.8%) | 17 (19.5%) |
| Both | 9 (25.7%) | 35 (67.3%) | 44 (50.6%) |
| Valid N | 35 | 52 | 87 |
| Valid N | 45 | 54 | 99 |
| N missings | 9 | 24 | 33 |

**Abbreviations:** N: Total number of patients.

Table S5 Ambulance in the last year

|  |  | **Mild Asthma** | **Moderate/severe Asthma** | **Total** |
| --- | --- | --- | --- | --- |
| Use of ambulance | No | 42 (100.0%) | 43 (93.5%) | 85 (96.6%) |
| Yes | 0 | 3 (6.5%) | 3 (3.4%) |
| Programmed ambulance | 0 | 0 | 0 |
| *Financed by Social security | - | - | - |
| *Not Financed by Social security | - | - | - |
| *Not know | - | - | - |
| Emergencies ambulance | 0 | 3 (100.0%) | 3 (100.0%) |
| *Financed by Social security | 0 | 3 (100.0%) | 3 (100.0%) |
| *Not Financed by Social security | 0 | 0 | 0 |
| *Not know | 0 | 0 | 0 |
| Valid N | 0 | 3 | 3 |
| Valid N | 42 | 46 | 88 |
| N missings | 12 | 32 | 44 |
| Number of programmed ambulances in the last year | Mean (SD) | - | - | - |
| Valid N | - | - | - |
| Number of emergencies ambulances in the last year | Mean (SD) | - | 1.33 (0.58) | 1.33 (0.58) |
| Valid N | - | 3 | 3 |

**Abbreviations:** N: Total number of patients; SD: Standard deviation.

Table S6 Direct non-health resources in the last year

|  |  | **Mild Asthma** | **Moderate/severe Asthma** | **Total** |
| --- | --- | --- | --- | --- |
| Help of caregiver | No | 41 (97.6%) | 34 (73.9%) | 75 (85.2%) |
| Yes - With economic benefits | 0 | 0 | 0 |
| Yes - Without economic benefits | 1 (2.4%) | 12 (26.1%) | 13 (14.8%) |
| Valid N | 42 | 46 | 88 |
| N missings | 12 | 32 | 44 |
| Financed by social security | Yes | - | - | - |
| No, payed for patient | - | - | - |
| No, split costs among social security and patients or family | - | - | - |
| Valid N | - | - | - |
| Hours/months for caregiver payed for patients | Valid N | - | - | - |
| Euros/months for caregiver payed for patients | Valid N | - | - | - |
| Hours/months for caregiver payed with co-pay | Valid N | - | - | - |
| Euros/months for caregiver payed with co-pay | Valid N | - | - | - |
| Not payed assistance | Couple | 1 (100.0%) | 8 (66.7%) | 9 (69.2%) |
| Son/Daughter | 0 | 3 (25.0%) | 3 (23.1%) |
| Other relative | 0 | 6 (50.0%) | 6 (46.2%) |
| Neighbour | 0 | 0 | 0 |
| Volunteer | 0 | 0 | 0 |
| Another person | 0 | 0 | 0 |
| Valid N | 1 | 12 | 13 |
| N missings | 0 | 0 | 0 |
| Hours/day doing assistance | Mean (SD) | 1.00 (.) | 1.92 (0.90) | 1.85 (0.90) |
| Valid N | 1 | 12 | 13 |
| Days/week doing assistance | Mean (SD) | 5.00 (.) | 4.42 (2.64) | 4.46 (2.54) |
| Valid N | 1 | 12 | 13 |

**Abbreviations:** N: Total number of patients; SD: Standard deviation.

Table S7 Loss of work productivity of informal caregiver and additional expenditures

|  |  | **Mild Asthma** | **Moderate/severe Asthma** | **Total** |
| --- | --- | --- | --- | --- |
| Other expenses related to asthma | No | 38 (90.5%) | 29 (63.0%) | 67 (76.1%) |
| Yes | 4 (9.5%) | 17 (37.0%) | 21 (23.9%) |
| Valid N | 42 | 46 | 88 |
| Euros/months for additional expenses | Mean (SD) | 9.0 (8.5) | 97.1 (118.5) | 85.3 (114.1) |
| Valid N | 2 | 13 | 15 |
| Missing daily job for no formal caregiver to help asthma patient | Yes | 1 (100.0%) | 10 (83.3%) | 11 (84.6%) |
| No | 0 | 1 (8.3%) | 1 (7.7%) |
| Not working | 0 | 1 (8.3%) | 1 (7.7%) |
| Valid N | 1 | 12 | 13 |
| Working status | Active | 45 (83.3%) | 52 (66.7%) | 97 (73.5%) |
| Full time | 38 (84.4%) | 46 (88.5%) | 84 (86.6%) |
| Partial time | 7 (15.6%) | 6 (11.5%) | 13 (13.4%) |
| Valid N | 45 | 52 | 97 |
| No active | 9 (16.7%) | 26 (33.3%) | 35 (26.5%) |
| Valid N | 54 | 78 | 132 |
| Partial time hours (h/week) | Mean (SD) | 26.0 (10.3) | 30.9 (12.3) | 28.3 (11.1) |
| Valid N | 7 | 6 | 13 |
| Laboral disability (Active workers) | Without laboral disability | 45 (100.0%) | 50 (96.2%) | 95 (97.9%) |
| With laboral disability | 0 | 2 (3.8%) | 2 (2.1%) |
| Partial permanent | 0 | 2 (100.0%) | 2 (100.0%) |
| Total permanent | 0 | 0 | 0 |
| Laboral disability due to asthma | 0 | 0 | 0 |
| Laboral disability not due to asthma | 0 | 2 (100.0%) | 2 (100.0%) |
| Valid N | 0 | 2 | 2 |
| Valid N | 45 | 52 | 97 |
| N missing | 0 | 0 | 0 |
| No active workers | Student | 3 (33.3%) | 7 (26.9%) | 10 (28.6%) |
| Jubilant | 2 (22.2%) | 6 (23.1%) | 8 (22.9%) |
| Due to Asthma | 0 | 0 | 0 |
| Not due to Asthma | 2 (100.0%) | 6 (100.0%) | 8 (100.0%) |
| Valid N | 2 | 6 | 8 |
| Not working | 2 (22.2%) | 5 (19.2%) | 7 (20.0%) |
| Due to Asthma | 2 (100.0%) | 2 (40.0%) | 4 (57.1%) |
| Not due to Asthma | 0 | 3 (60.0%) | 3 (42.9%) |
| Valid N | 2 | 5 | 7 |
| Housework | 1 (11.1%) | 5 (19.2%) | 6 (17.1%) |
| Without Laboral disability | 0 | 0 | 0 |
| With laboral disability | 1 (11.1%) | 3 (11.5%) | 4 (11.4%) |
| Valid N | 9 | 26 | 35 |
| N missings | 0 | 0 | 0 |
| Percentage of disability | Mean (SD) | 68.0 (.) | 48.3 (16.7) | 53.3 (16.8) |
| Valid N | 1 | 3 | 4 |
| Time with disability (years) | Mean (SD) | 8.0 (.) | 8.3 (1.5) | 8.3 (1.3) |
| Valid N | 1 | 3 | 4 |
| Type of disability | Medical sick leave | 0 | 0 | 0 |
| Partial permanent | 0 | 0 | 0 |
| Total permanent | 0 | 1 (33.3%) | 1 (25.0%) |
| Absolut permanent | 1 (100.0%) | 1 (33.3%) | 2 (50.0%) |
| Big disability | 0 | 0 | 0 |
| Not know | 0 | 1 (33.3%) | 1 (25.0%) |
| Valid N | 1 | 3 | 4 |
| Economic help due to asthma disability different from retirement pension (jubilant) | Yes | 0 | 0 | 0 |
| No (denied) | 1 (50.0%) | 1 (16.7%) | 2 (25.0%) |
| Not applied | 1 (50.0%) | 5 (83.3%) | 6 (75.0%) |
| Not know | 0 | 0 | 0 |
| No response | 0 | 0 | 0 |
| Valid N | 2 | 6 | 8 |
| Economic help due to asthma disability different from retirement pension (Euros/month) | Valid N | - | - | - |

**Abbreviations:** N: Total number of patients; SD: Standard deviation.
